# Supplementary material for: A niche comparison of Emiliania huxleyi and Gephyrocapsa oceanica and potential effects of climate change
Source: Copernicus journal article supplement (doi:10.5194/bg-2018-88), 2018-03-01
Supplement: Supplementary file 1 [file bg-2018-88-supplement.pdf]

## 1 Supplementary tables and figures

**Table S1.** Carbonate chemistry speciation, temperature, light conditions and measured physiological parameters for *E. huxleyi* measured in this study.

| $\mu$<br>( $d^{-1}$ ) | POC<br>Rate<br>( $\frac{pg\ C}{cell\ d}$ ) | PIC<br>Rate<br>( $\frac{pg\ C}{cell\ d}$ ) | POC<br>Quota<br>( $pg\ C\ cell^{-1}$ ) | PIC<br>Quota<br>( $pg\ C\ cell^{-1}$ ) | $fCO_2$<br>( $\mu atm$ ) | $[CO_2]$<br>( $\mu mol\ kg^{-1}$ ) | $[HCO_3^-]$<br>( $\mu mol\ kg^{-1}$ ) | $[CO_3^{2-}]$<br>( $\mu mol\ kg^{-1}$ ) | pH <sub>T</sub> | $[H^+]$<br>( $\frac{mol}{kg}$ ) | TA<br>( $\mu mol\ kg^{-1}$ ) | DIC<br>( $\mu mol\ kg^{-1}$ ) | Light<br>( $\frac{\mu mol}{m^2\ s}$ ) | Temp.<br>( $^{\circ}C$ ) |
|-----------------------|--------------------------------------------|--------------------------------------------|----------------------------------------|----------------------------------------|--------------------------|------------------------------------|---------------------------------------|-----------------------------------------|-----------------|---------------------------------|------------------------------|-------------------------------|---------------------------------------|--------------------------|
| 0.65                  | 5.45                                       | 5.03                                       | 8.45                                   | 7.80                                   | 52                       | 1.68                               | 1102.8                                | 507.1                                   | 8.709           | 1.95E-09                        | 2362.53                      | 1611.52                       | 50                                    | 20                       |
| 0.92                  | 8.52                                       | 7.17                                       | 9.30                                   | 7.83                                   | 111                      | 3.60                               | 1417.5                                | 390.8                                   | 8.487           | 3.26E-09                        | 2383.83                      | 1811.94                       | 50                                    | 20                       |
| 0.96                  | 8.24                                       | 6.73                                       | 8.55                                   | 6.99                                   | 202                      | 6.55                               | 1661.1                                | 294.5                                   | 8.295           | 5.07E-09                        | 2388.56                      | 1962.17                       | 50                                    | 20                       |
| 0.95                  | 8.42                                       | 6.94                                       | 8.84                                   | 7.28                                   | 339                      | 10.97                              | 1882.6                                | 225.9                                   | 8.126           | 7.49E-09                        | 2438.75                      | 2119.51                       | 50                                    | 20                       |
| 0.91                  | 9.69                                       | 7.07                                       | 10.66                                  | 7.77                                   | 663                      | 21.48                              | 2066.8                                | 139.1                                   | 7.875           | 1.33E-08                        | 2411.09                      | 2227.35                       | 50                                    | 20                       |
| 0.95                  | 7.58                                       | 6.00                                       | 8.01                                   | 6.34                                   | 738                      | 23.92                              | 2102                                  | 129.2                                   | 7.835           | 1.46E-08                        | 2421.75                      | 2255.07                       | 50                                    | 20                       |
| 0.92                  | 8.69                                       | 4.98                                       | 9.50                                   | 5.44                                   | 1292                     | 41.88                              | 2169.2                                | 78.6                                    | 7.606           | 2.48E-08                        | 2365.91                      | 2289.62                       | 50                                    | 20                       |
| 0.89                  | 8.32                                       | 4.97                                       | 9.37                                   | 5.59                                   | 1730                     | 56.07                              | 2213.6                                | 61.1                                    | 7.488           | 3.25E-08                        | 2367.40                      | 2330.77                       | 50                                    | 20                       |
| 0.92                  | 7.61                                       | 4.98                                       | 8.31                                   | 5.44                                   | 1755                     | 56.86                              | 2288.9                                | 64.5                                    | 7.496           | 3.19E-08                        | 2449.87                      | 2410.19                       | 50                                    | 20                       |
| 0.86                  | 7.01                                       | 3.81                                       | 8.12                                   | 4.41                                   | 2906                     | 94.19                              | 2314.4                                | 39.8                                    | 7.282           | 5.23E-08                        | 2415.35                      | 2448.34                       | 50                                    | 20                       |
| 0.82                  | 6.92                                       | 3.08                                       | 8.45                                   | 3.76                                   | 4044                     | 131.06                             | 2366.4                                | 29.9                                    | 7.148           | 7.11E-08                        | 2442.96                      | 2527.35                       | 50                                    | 20                       |
| 0.20                  | 1.43                                       | 1.04                                       | 7.23                                   | 5.25                                   | 31                       | 1.01                               | 891.3                                 | 549.8                                   | 8.837           | 1.46E-09                        | 2273.35                      | 1442.07                       | 400                                   | 20                       |
| 1.38                  | 10.39                                      | 9.25                                       | 7.53                                   | 6.70                                   | 120                      | 3.88                               | 1400.7                                | 353.5                                   | 8.449           | 3.56E-09                        | 2282.44                      | 1758.03                       | 400                                   | 20                       |
| 1.48                  | 14.68                                      | 8.10                                       | 9.92                                   | 5.47                                   | 234                      | 7.59                               | 1657.7                                | 253.4                                   | 8.231           | 5.88E-09                        | 2289.17                      | 1918.66                       | 400                                   | 20                       |
| 1.66                  | 15.82                                      | 10.88                                      | 9.53                                   | 6.55                                   | 372                      | 12.06                              | 1842.2                                | 196.9                                   | 8.075           | 8.41E-09                        | 2331.44                      | 2051.15                       | 400                                   | 20                       |
| 1.65                  | 17.93                                      | 11.78                                      | 10.86                                  | 7.14                                   | 697                      | 22.60                              | 2007                                  | 124.7                                   | 7.840           | 1.45E-08                        | 2318.37                      | 2154.31                       | 400                                   | 20                       |
| 1.59                  | 14.32                                      | 7.62                                       | 9.01                                   | 4.79                                   | 1001                     | 32.44                              | 2080.8                                | 93.4                                    | 7.699           | 2.00E-08                        | 2314.91                      | 2206.65                       | 400                                   | 20                       |
| 1.51                  | 17.31                                      | 10.07                                      | 11.46                                  | 6.67                                   | 1280                     | 41.48                              | 2161.4                                | 78.8                                    | 7.608           | 2.46E-08                        | 2358.80                      | 2281.69                       | 400                                   | 20                       |
| 1.32                  | 13.76                                      | 6.59                                       | 10.43                                  | 4.99                                   | 1359                     | 44.03                              | 2179.2                                | 75.5                                    | 7.586           | 2.59E-08                        | 2368.27                      | 2298.73                       | 400                                   | 20                       |
| 1.28                  | 15.01                                      | 6.51                                       | 11.73                                  | 5.09                                   | 2203                     | 71.40                              | 2233.9                                | 48.9                                    | 7.387           | 4.10E-08                        | 2357.77                      | 2354.22                       | 400                                   | 20                       |
| 1.09                  | 11.94                                      | 4.93                                       | 10.96                                  | 4.52                                   | 3206                     | 103.88                             | 2276.1                                | 34.9                                    | 7.232           | 5.86E-08                        | 2365.38                      | 2414.85                       | 400                                   | 20                       |
| 0.73                  | 7.87                                       | 2.61                                       | 10.78                                  | 3.58                                   | 4004                     | 129.77                             | 2236.8                                | 27.0                                    | 7.128           | 7.45E-08                        | 2306.96                      | 2393.57                       | 400                                   | 20                       |
| 0.20                  | 2.52                                       | 1.80                                       | 12.91                                  | 9.23                                   | 32                       | 1.04                               | 912.6                                 | 561.2                                   | 8.835           | 1.46E-09                        | 2317.05                      | 1474.81                       | 600                                   | 20                       |
| 0.77                  | 7.56                                       | 8.38                                       | 9.80                                   | 10.88                                  | 54                       | 1.74                               | 1104.1                                | 489.4                                   | 8.693           | 2.03E-09                        | 2323.81                      | 1595.15                       | 600                                   | 20                       |
| 1.17                  | 14.85                                      | 9.90                                       | 12.65                                  | 8.43                                   | 116                      | 3.77                               | 1427.2                                | 378.4                                   | 8.470           | 3.39E-09                        | 2364.32                      | 1809.37                       | 600                                   | 20                       |
| 1.35                  | 23.50                                      | 11.85                                      | 17.39                                  | 8.77                                   | 258                      | 8.36                               | 1682.9                                | 236.9                                   | 8.195           | 6.38E-09                        | 2274.10                      | 1928.12                       | 600                                   | 20                       |
| 1.48                  | 21.15                                      | 16.11                                      | 14.28                                  | 10.87                                  | 405                      | 13.11                              | 1872                                  | 187.0                                   | 8.046           | 8.99E-09                        | 2336.53                      | 2072.08                       | 600                                   | 20                       |
| 1.53                  | 24.07                                      | 17.16                                      | 15.77                                  | 11.25                                  | 779                      | 25.25                              | 2034.7                                | 114.7                                   | 7.798           | 1.59E-08                        | 2321.29                      | 2174.65                       | 600                                   | 20                       |
| 1.48                  | 17.12                                      | 10.69                                      | 11.60                                  | 7.25                                   | 1148                     | 37.19                              | 2099.3                                | 82.9                                    | 7.643           | 2.28E-08                        | 2307.58                      | 2219.35                       | 600                                   | 20                       |
| 1.51                  | 17.98                                      | 12.86                                      | 11.95                                  | 8.55                                   | 1070                     | 34.68                              | 2161.8                                | 94.3                                    | 7.686           | 2.06E-08                        | 2396.57                      | 2290.78                       | 600                                   | 20                       |
| 1.38                  | 24.65                                      | 8.78                                       | 17.83                                  | 6.35                                   | 2275                     | 73.73                              | 2206.3                                | 46.2                                    | 7.367           | 4.29E-08                        | 2323.78                      | 2326.20                       | 600                                   | 20                       |
| 1.23                  | 15.25                                      | 7.49                                       | 12.40                                  | 6.09                                   | 2603                     | 84.35                              | 2234                                  | 41.4                                    | 7.314           | 4.85E-08                        | 2339.59                      | 2359.79                       | 600                                   | 20                       |
| 1.14                  | 20.22                                      | 6.28                                       | 17.72                                  | 5.50                                   | 3493                     | 113.21                             | 2310.5                                | 33.0                                    | 7.201           | 6.29E-08                        | 2394.97                      | 2456.72                       | 600                                   | 20                       |
| 0.71                  | 11.54                                      | 2.80                                       | 16.17                                  | 3.93                                   | 4617                     | 149.62                             | 2284.2                                | 24.4                                    | 7.075           | 8.41E-08                        | 2347.77                      | 2458.25                       | 600                                   | 20                       |
| 1.62                  | 14.84                                      | 11.86                                      | 9.18                                   | 7.34                                   | 660                      | 21.40                              | 2086.7                                | 142.3                                   | 7.880           | 1.32E-08                        | 2438.16                      | 2250.41                       | 600                                   | 20                       |
| 1.61                  | 16.35                                      | 9.26                                       | 10.15                                  | 5.75                                   | 1193                     | 38.66                              | 2176.8                                | 85.8                                    | 7.642           | 2.28E-08                        | 2390.76                      | 2301.22                       | 600                                   | 20                       |
| 1.55                  | 20.58                                      | 9.03                                       | 13.32                                  | 5.84                                   | 1712                     | 55.48                              | 2244.3                                | 63.5                                    | 7.498           | 3.17E-08                        | 2403.51                      | 2363.27                       | 600                                   | 20                       |
| 1.39                  | 13.42                                      | 6.01                                       | 9.66                                   | 4.33                                   | 2125                     | 68.86                              | 2271.6                                | 52.4                                    | 7.410           | 3.89E-08                        | 2403.62                      | 2392.83                       | 600                                   | 20                       |
| 1.27                  | 12.66                                      | 6.54                                       | 9.98                                   | 5.16                                   | 3201                     | 103.74                             | 2327.3                                | 36.5                                    | 7.242           | 5.72E-08                        | 2420.26                      | 2467.56                       | 600                                   | 20                       |
| 1.01                  | 11.98                                      | 3.45                                       | 11.86                                  | 3.41                                   | 4248                     | 137.68                             | 2372.6                                | 28.6                                    | 7.128           | 7.45E-08                        | 2445.94                      | 2538.84                       | 600                                   | 20                       |
| 0.89                  | 9.36                                       | 7.90                                       | 10.56                                  | 8.91                                   | 50                       | 1.64                               | 1080.4                                | 499.0                                   | 8.711           | 1.94E-09                        | 2324.59                      | 1581.05                       | 1200                                  | 20                       |
| 1.48                  | 16.28                                      | 12.24                                      | 10.98                                  | 8.26                                   | 181                      | 5.87                               | 1622.6                                | 313.9                                   | 8.333           | 4.64E-09                        | 2397.46                      | 1942.41                       | 1200                                  | 20                       |
| 1.62                  | 18.04                                      | 13.09                                      | 11.13                                  | 8.07                                   | 358                      | 11.59                              | 1847.4                                | 206.0                                   | 8.094           | 8.06E-09                        | 2358.09                      | 2065.02                       | 1200                                  | 20                       |
| 1.44                  | 21.26                                      | 11.35                                      | 14.72                                  | 7.86                                   | 1387                     | 44.94                              | 2156.9                                | 72.4                                    | 7.573           | 2.68E-08                        | 2338.85                      | 2274.23                       | 1200                                  | 20                       |
| 0.91                  | 18.23                                      | 4.87                                       | 20.03                                  | 5.35                                   | 3788                     | 122.75                             | 2244.1                                | 28.7                                    | 7.153           | 7.02E-08                        | 2318.47                      | 2395.58                       | 1200                                  | 20                       |
| 1.26                  | 16.85                                      | 11.55                                      | 13.35                                  | 9.15                                   | 122                      | 3.95                               | 1423.9                                | 359.1                                   | 8.448           | 3.56E-09                        | 2316.77                      | 1786.90                       | 1200                                  | 20                       |
| 1.43                  | 28.89                                      | 15.27                                      | 20.23                                  | 10.69                                  | 768                      | 24.90                              | 2039.3                                | 116.8                                   | 7.805           | 1.57E-08                        | 2330.87                      | 2181.00                       | 1200                                  | 20                       |
| 1.18                  | 40.19                                      | 13.45                                      | 34.18                                  | 11.44                                  | 2171                     | 70.37                              | 2265.5                                | 51.0                                    | 7.399           | 3.99E-08                        | 2394.25                      | 2386.92                       | 1200                                  | 20                       |

**Table S2.** Carbonate chemistry speciation, temperature, light conditions and measured physiological parameters for *E. huxleyi* used in this study taken from Sett et al. (2014).

| $\mu$<br>( $d^{-1}$ ) | POC<br>Rate<br>( $\frac{pg\ C}{cell\ d}$ ) | PIC<br>Rate<br>( $\frac{pg\ C}{cell\ d}$ ) | POC<br>Quota<br>( $pg\ C\ cell^{-1}$ ) | PIC<br>Quota<br>( $pg\ C\ cell^{-1}$ ) | $fCO_2$<br>( $\mu atm$ ) | $[CO_2]$<br>( $\mu mol\ kg^{-1}$ ) | $[HCO_3^-]$<br>( $\mu mol\ kg^{-1}$ ) | $[CO_3^{2-}]$<br>( $\mu mol\ kg^{-1}$ ) | pH <sub>T</sub> | $[H^+]$<br>( $\frac{mol}{kg}$ ) | TA<br>( $\mu mol\ kg^{-1}$ ) | DIC<br>( $\mu mol\ kg^{-1}$ ) | Light<br>( $\frac{\mu mol}{m^2\ s}$ ) | Temp.<br>( $^{\circ}C$ ) |
|-----------------------|--------------------------------------------|--------------------------------------------|----------------------------------------|----------------------------------------|--------------------------|------------------------------------|---------------------------------------|-----------------------------------------|-----------------|---------------------------------|------------------------------|-------------------------------|---------------------------------------|--------------------------|
| 0.42                  | 3.52                                       | 3.12                                       | 8.38                                   | 7.43                                   | 84                       | 3.69                               | 1458.4                                | 347.6                                   | 8.591           | 2.57E-09                        | 2327.50                      | 1809.70                       | 150                                   | 10                       |
| 0.52                  | 5.44                                       | 5.33                                       | 10.46                                  | 10.25                                  | 129                      | 5.64                               | 1633.2                                | 284.9                                   | 8.455           | 3.51E-09                        | 2345.60                      | 1923.80                       | 150                                   | 10                       |
| 0.58                  | 8.86                                       | 7.02                                       | 15.28                                  | 12.10                                  | 193                      | 8.49                               | 1778.4                                | 224.5                                   | 8.315           | 4.85E-09                        | 2341.10                      | 2011.40                       | 150                                   | 10                       |
| 0.61                  | 8.63                                       | 7.29                                       | 14.15                                  | 11.95                                  | 263                      | 11.53                              | 1881.2                                | 184.9                                   | 8.206           | 6.22E-09                        | 2345.30                      | 2077.60                       | 150                                   | 10                       |
| 0.64                  | 7.51                                       | 6.72                                       | 11.73                                  | 10.50                                  | 356                      | 15.64                              | 1961.4                                | 148.2                                   | 8.092           | 8.10E-09                        | 2334.60                      | 2125.20                       | 150                                   | 10                       |
| 0.65                  | 7.80                                       | 6.38                                       | 12.00                                  | 9.82                                   | 474                      | 20.80                              | 2020                                  | 118.2                                   | 7.981           | 1.05E-08                        | 2319.00                      | 2159.00                       | 150                                   | 10                       |
| 0.62                  | 8.62                                       | 6.15                                       | 13.90                                  | 9.92                                   | 591                      | 25.95                              | 2061.1                                | 98.6                                    | 7.893           | 1.28E-08                        | 2311.50                      | 2185.70                       | 150                                   | 10                       |
| 0.63                  | 7.34                                       | 6.21                                       | 11.65                                  | 9.86                                   | 701                      | 30.75                              | 2102.7                                | 86.6                                    | 7.828           | 1.49E-08                        | 2322.90                      | 2220.10                       | 150                                   | 10                       |
| 0.60                  | 6.62                                       | 5.86                                       | 11.03                                  | 9.77                                   | 781                      | 34.26                              | 2124.8                                | 79.4                                    | 7.786           | 1.64E-08                        | 2326.80                      | 2238.40                       | 150                                   | 10                       |
| 0.58                  | 6.63                                       | 5.03                                       | 11.43                                  | 8.67                                   | 916                      | 40.18                              | 2148.6                                | 69.2                                    | 7.721           | 1.90E-08                        | 2325.30                      | 2258.00                       | 150                                   | 10                       |
| 0.55                  | 6.54                                       | 4.33                                       | 11.89                                  | 7.87                                   | 1132                     | 49.68                              | 2182.7                                | 57.8                                    | 7.636           | 2.31E-08                        | 2330.70                      | 2290.10                       | 150                                   | 10                       |
| 0.51                  | 6.96                                       | 4.12                                       | 13.65                                  | 8.08                                   | 1521                     | 66.73                              | 2219.4                                | 44.5                                    | 7.515           | 3.05E-08                        | 2334.20                      | 2330.60                       | 150                                   | 10                       |
| 0.43                  | 5.53                                       | 3.62                                       | 12.86                                  | 8.42                                   | 2121                     | 93.06                              | 2255.1                                | 32.9                                    | 7.378           | 4.19E-08                        | 2341.00                      | 2381.10                       | 150                                   | 10                       |
| 0.35                  | 4.72                                       | 1.67                                       | 13.49                                  | 4.77                                   | 2859                     | 125.46                             | 2276.2                                | 24.9                                    | 7.252           | 5.60E-08                        | 2341.90                      | 2426.50                       | 150                                   | 10                       |
| 0.30                  | 4.04                                       | 1.78                                       | 13.47                                  | 5.93                                   | 4075                     | 178.79                             | 2300.5                                | 17.8                                    | 7.103           | 7.89E-08                        | 2348.50                      | 2497.10                       | 150                                   | 10                       |
| 0.23                  | 3.78                                       | 0.89                                       | 16.43                                  | 3.87                                   | 5631                     | 247.09                             | 2312.5                                | 13.0                                    | 6.964           | 1.09E-07                        | 2348.40                      | 2572.60                       | 150                                   | 10                       |
| 0.34                  | 4.41                                       | 2.37                                       | 12.84                                  | 6.89                                   | 19                       | 0.70                               | 810.5                                 | 609.6                                   | 9.005           | 9.88E-10                        | 2334.10                      | 1420.80                       | 150                                   | 15                       |
| 0.69                  | 4.67                                       | 4.09                                       | 6.81                                   | 5.95                                   | 46                       | 1.73                               | 1132                                  | 478.2                                   | 8.755           | 1.76E-09                        | 2324.41                      | 1612.03                       | 150                                   | 15                       |
| 0.98                  | 7.78                                       | 5.40                                       | 7.96                                   | 5.53                                   | 83                       | 3.13                               | 1361.6                                | 383.8                                   | 8.579           | 2.64E-09                        | 2318.52                      | 1748.58                       | 150                                   | 15                       |
| 1.07                  | 9.63                                       | 7.20                                       | 9.00                                   | 6.73                                   | 131                      | 4.91                               | 1537.7                                | 311.7                                   | 8.436           | 3.67E-09                        | 2315.27                      | 1854.27                       | 150                                   | 15                       |
| 1.11                  | 13.27                                      | 8.94                                       | 11.97                                  | 8.06                                   | 195                      | 7.32                               | 1683.6                                | 250.6                                   | 8.302           | 4.99E-09                        | 2309.83                      | 1941.62                       | 150                                   | 15                       |
| 1.11                  | 12.64                                      | 9.09                                       | 11.40                                  | 8.20                                   | 269                      | 10.09                              | 1782.1                                | 203.7                                   | 8.187           | 6.50E-09                        | 2292.54                      | 1995.94                       | 150                                   | 15                       |
| 1.09                  | 11.79                                      | 11.00                                      | 10.78                                  | 10.06                                  | 374                      | 14.01                              | 1885.6                                | 164.3                                   | 8.069           | 8.53E-09                        | 2297.63                      | 2063.84                       | 150                                   | 15                       |
| 1.11                  | 13.39                                      | 8.90                                       | 12.11                                  | 8.04                                   | 461                      | 17.26                              | 1945.7                                | 141.9                                   | 7.992           | 1.02E-08                        | 2302.03                      | 2104.84                       | 150                                   | 15                       |
| 1.07                  | 14.35                                      | 7.23                                       | 13.37                                  | 6.74                                   | 581                      | 21.78                              | 1991.8                                | 117.9                                   | 7.901           | 1.26E-08                        | 2288.81                      | 2131.44                       | 150                                   | 15                       |
| 1.07                  | 12.19                                      | 4.75                                       | 11.44                                  | 4.46                                   | 704                      | 26.38                              | 2045.9                                | 102.7                                   | 7.830           | 1.48E-08                        | 2304.77                      | 2174.97                       | 150                                   | 15                       |
| 1.07                  | 9.78                                       | 6.03                                       | 9.15                                   | 5.64                                   | 846                      | 31.70                              | 2072.9                                | 87.7                                    | 7.756           | 1.76E-08                        | 2294.83                      | 2192.34                       | 150                                   | 15                       |
| 1.04                  | 10.82                                      | 6.88                                       | 10.38                                  | 6.60                                   | 933                      | 34.96                              | 2091.3                                | 80.9                                    | 7.717           | 1.92E-08                        | 2296.32                      | 2207.19                       | 150                                   | 15                       |
| 1.05                  | 11.66                                      | 7.07                                       | 11.14                                  | 6.76                                   | 955                      | 35.78                              | 2110.5                                | 80.6                                    | 7.711           | 1.95E-08                        | 2314.29                      | 2226.86                       | 150                                   | 15                       |
| 1.01                  | 9.59                                       | 5.98                                       | 9.49                                   | 5.92                                   | 1110                     | 41.59                              | 2124.3                                | 70.2                                    | 7.648           | 2.25E-08                        | 2302.48                      | 2236.06                       | 150                                   | 15                       |
| 0.94                  | 11.73                                      | 4.11                                       | 12.54                                  | 4.40                                   | 1739                     | 65.14                              | 2171.3                                | 46.8                                    | 7.463           | 3.44E-08                        | 2291.48                      | 2283.22                       | 150                                   | 15                       |
| 0.85                  | 10.73                                      | 3.51                                       | 12.61                                  | 4.13                                   | 2392                     | 89.60                              | 2203.2                                | 35.1                                    | 7.331           | 4.67E-08                        | 2294.10                      | 2327.87                       | 150                                   | 15                       |
| 0.78                  | 9.97                                       | 2.95                                       | 12.81                                  | 3.79                                   | 3032                     | 113.56                             | 2232.7                                | 28.4                                    | 7.234           | 5.84E-08                        | 2306.94                      | 2374.69                       | 150                                   | 15                       |
| 0.67                  | 6.84                                       | 2.40                                       | 10.17                                  | 3.57                                   | 3678                     | 137.79                             | 2256.5                                | 23.9                                    | 7.154           | 7.01E-08                        | 2319.42                      | 2418.18                       | 150                                   | 15                       |
| 0.60                  | 5.41                                       | 1.90                                       | 9.09                                   | 3.19                                   | 4752                     | 178.02                             | 2262.8                                | 18.6                                    | 7.044           | 9.03E-08                        | 2312.56                      | 2459.46                       | 150                                   | 15                       |
| 0.51                  | 4.69                                       | 1.46                                       | 9.25                                   | 2.88                                   | 5466                     | 204.77                             | 2292.2                                | 16.6                                    | 6.989           | 1.03E-07                        | 2336.84                      | 2513.60                       | 150                                   | 15                       |
| 0.73                  | 1.82                                       | 2.52                                       | 2.49                                   | 3.45                                   | 82                       | 2.65                               | 1275.6                                | 429.8                                   | 8.574           | 2.67E-09                        | 2343.00                      | 1708.00                       | 150                                   | 20                       |
| 0.83                  | 4.32                                       | 5.72                                       | 5.20                                   | 6.89                                   | 131                      | 4.24                               | 1458.7                                | 351.0                                   | 8.428           | 3.73E-09                        | 2330.30                      | 1813.90                       | 150                                   | 20                       |
| 1.25                  | 6.08                                       | 7.62                                       | 4.86                                   | 6.10                                   | 196                      | 6.36                               | 1613.2                                | 286.4                                   | 8.296           | 5.06E-09                        | 2324.60                      | 1906.00                       | 150                                   | 20                       |
| 1.35                  | 6.00                                       | 7.76                                       | 4.44                                   | 5.75                                   | 268                      | 8.68                               | 1726.4                                | 240.3                                   | 8.190           | 6.45E-09                        | 2323.50                      | 1975.40                       | 150                                   | 20                       |
| 1.26                  | 8.99                                       | 10.03                                      | 7.13                                   | 7.96                                   | 370                      | 11.99                              | 1831.2                                | 195.6                                   | 8.075           | 8.41E-09                        | 2317.90                      | 2038.80                       | 150                                   | 20                       |
| 1.29                  | 8.48                                       | 9.40                                       | 6.57                                   | 7.29                                   | 481                      | 15.59                              | 1912.6                                | 164.1                                   | 7.980           | 1.05E-08                        | 2321.20                      | 2092.30                       | 150                                   | 20                       |
| 1.37                  | 8.84                                       | 9.62                                       | 6.45                                   | 7.02                                   | 590                      | 19.11                              | 1966.1                                | 141.5                                   | 7.904           | 1.25E-08                        | 2318.90                      | 2126.70                       | 150                                   | 20                       |
| 1.39                  | 10.59                                      | 10.61                                      | 7.62                                   | 7.63                                   | 700                      | 22.68                              | 2025.8                                | 126.6                                   | 7.842           | 1.44E-08                        | 2341.10                      | 2175.00                       | 150                                   | 20                       |
| 1.38                  | 10.40                                      | 8.73                                       | 7.54                                   | 6.33                                   | 823                      | 26.69                              | 2058.9                                | 111.1                                   | 7.779           | 1.66E-08                        | 2336.30                      | 2196.70                       | 150                                   | 20                       |
| 1.38                  | 10.62                                      | 10.24                                      | 7.70                                   | 7.42                                   | 954                      | 30.93                              | 2082.1                                | 98.1                                    | 7.720           | 1.91E-08                        | 2327.50                      | 2211.10                       | 150                                   | 20                       |
| 1.46                  | 9.91                                       | 7.74                                       | 6.79                                   | 5.30                                   | 1255                     | 40.67                              | 2067.2                                | 73.5                                    | 7.597           | 2.53E-08                        | 2253.20                      | 2181.40                       | 150                                   | 20                       |
| 1.40                  | 9.03                                       | 7.78                                       | 6.45                                   | 5.56                                   | 1136                     | 36.81                              | 2115.4                                | 85.0                                    | 7.651           | 2.23E-08                        | 2328.60                      | 2237.20                       | 150                                   | 20                       |
| 1.37                  | 9.49                                       | 8.13                                       | 6.93                                   | 5.93                                   | 1438                     | 46.60                              | 2155.9                                | 69.8                                    | 7.557           | 2.78E-08                        | 2331.50                      | 2272.30                       | 150                                   | 20                       |
| 1.32                  | 9.25                                       | 6.49                                       | 7.01                                   | 4.92                                   | 2466                     | 79.93                              | 2144.2                                | 40.2                                    | 7.320           | 4.79E-08                        | 2247.70                      | 2264.40                       | 150                                   | 20                       |
| 1.19                  | 9.97                                       | 4.77                                       | 8.38                                   | 4.01                                   | 3307                     | 107.16                             | 2200.1                                | 31.6                                    | 7.204           | 6.25E-08                        | 2281.90                      | 2338.90                       | 150                                   | 20                       |
| 1.09                  | 7.16                                       | 3.99                                       | 6.57                                   | 3.66                                   | 3945                     | 127.84                             | 2189.4                                | 26.2                                    | 7.125           | 7.50E-08                        | 2258.00                      | 2343.50                       | 150                                   | 20                       |
| 0.96                  | 7.26                                       | 3.62                                       | 7.56                                   | 3.77                                   | 4284                     | 138.84                             | 2253.4                                | 25.6                                    | 7.102           | 7.91E-08                        | 2320.00                      | 2417.80                       | 150                                   | 20                       |
| 0.90                  | 6.40                                       | 3.03                                       | 7.11                                   | 3.37                                   | 5374                     | 174.16                             | 2264.4                                | 20.6                                    | 7.005           | 9.88E-08                        | 2318.70                      | 2459.20                       | 150                                   | 20                       |

**Table S3.** Optimum CO<sub>2</sub> concentrations, CO<sub>2</sub> K<sub>2</sub><sup>1</sup> concentrations and maximum rates (V<sub>max</sub>) at 50-800 μmol photons m<sup>-2</sup> s<sup>-1</sup> from Eq. (2) fit to: *G. oceanica* CO<sub>2</sub> data at 50, 100, 200, 400, 600 and 800 μmol photons m<sup>-2</sup> s<sup>-1</sup> and 20°C from Zhang et al. (2015) and *G. oceanica* CO<sub>2</sub> data from Sett et al. (2014). This table has been included for comparison to table 3 for *E. huxleyi*.

| CO <sub>2</sub>                                                           | 50<br>PAR | 100<br>PAR | 200<br>PAR | 400<br>PAR | 600<br>PAR | 800<br>PAR |
|---------------------------------------------------------------------------|-----------|------------|------------|------------|------------|------------|
| <b>CO<sub>2</sub> optima</b><br>(μmol kg <sup>-1</sup> )                  |           |            |            |            |            |            |
| Calcification                                                             | 7.09      | 8.46       | 9.69       | 10.48      | 10.62      | 10.55      |
| Photosynthesis                                                            | 13.75     | 15.18      | 15.57      | 14.84      | 14.00      | 13.29      |
| Growth rate                                                               | 9.09      | 10.89      | 12.63      | 13.95      | 14.36      | 14.45      |
| <b>V<sub>max</sub></b>                                                    |           |            |            |            |            |            |
| Calcification<br>(pg C cell <sup>-1</sup> d <sup>-1</sup> )               | 17.48     | 25.14      | 36.27      | 49.71      | 56.04      | 58.38      |
| Photosynthesis<br>(pg C cell <sup>-1</sup> d <sup>-1</sup> )              | 10.12     | 15.48      | 23.25      | 31.50      | 34.30      | 34.61      |
| Growth rate (d <sup>-1</sup> )                                            | 0.93      | 1.02       | 1.09       | 1.13       | 1.14       | 1.14       |
| <b>K<sub>2CO<sub>2</sub></sub><sup>1</sup> inhib μmol kg<sup>-1</sup></b> |           |            |            |            |            |            |
| Calcification                                                             | 28.32     | 29.14      | 28.81      | 27.51      | 26.53      | 25.86      |
| Photosynthesis                                                            | 99.45     | 72.56      | 54.41      | 42.01      | 37.02      | 34.27      |
| Growth rate                                                               | 42.20     | 51.21      | 60.33      | 67.73      | 70.42      | 71.32      |
| <b>K<sub>2CO<sub>2</sub></sub><sup>1</sup> sat μmol kg<sup>-1</sup></b>   |           |            |            |            |            |            |
| Calcification                                                             | 1.38      | 2.02       | 2.82       | 3.57       | 3.84       | 3.90       |
| Photosynthesis                                                            | 1.99      | 3.00       | 4.10       | 4.80       | 4.85       | 4.70       |
| Growth rate                                                               | 1.40      | 1.66       | 1.90       | 2.07       | 2.11       | 2.11       |

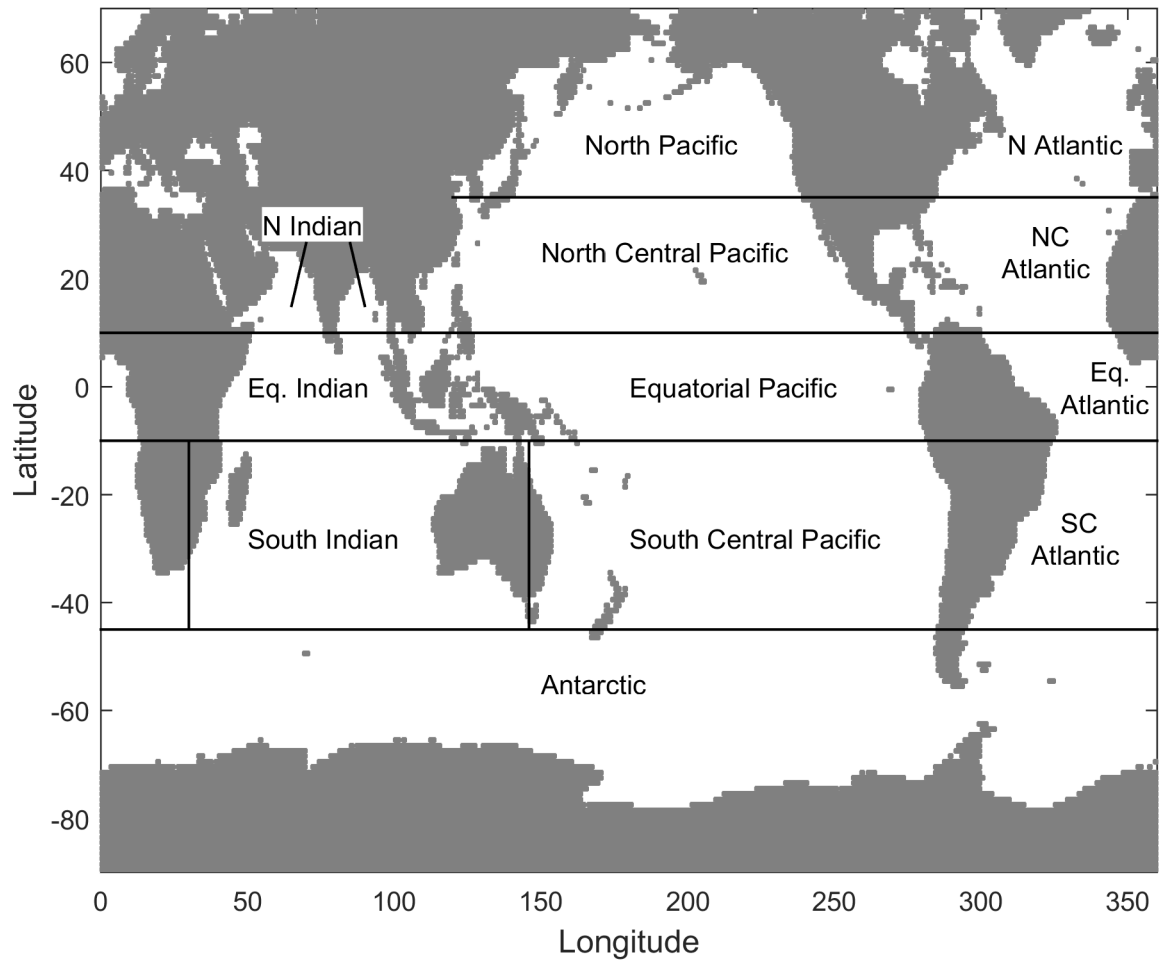

**Figure S1.** Major ocean biogeographical province definitions.

## References

- Sett, S., Bach, L. T., Schulz, K. G., Koch-Klavsen, S., Lebrato, M., and Riebesell, U.: Temperature modulates coccolithophorid sensitivity of growth, photosynthesis and calcification to increasing seawater  $p\text{CO}_2$ , *PLoS one*, 9, e88308, <https://doi.org/10.1371/journal.pone.0088308>, 2014.
- 5 Zhang, Y., Bach, L. T., Schulz, K. G., and Riebesell, U.: The modulating influence of light intensity on the response of the coccolithophore *Gephyrocapsa oceanica* to ocean acidification, *Limnology and Oceanography*, 60, 2145–2157, <https://doi.org/10.1002/lno.10161>, 2015.
